# Supplementary material for: A solution-processable and highly flexible conductor of a fluoroelastomer FKM and carbon nanotubes with tuned electrical conductivity and mechanical performance
Source: Royal Society of Chemistry journal article supplement (doi:10.1039/d2sm00838f), 2022-01-01
Supplement: d2sm00838f4.pdf [file d2sm00838f4.pdf]

## Supplementary Information

### **A solution-processable and highly flexible conductor of fluoroelastomer FKM and carbon nanotube with tuned electrical conductivity and mechanical performance**

Shaghayegh Shajari<sup>a,b</sup>, Mahmood Rajabian<sup>c</sup>, Milad Kamkar<sup>d</sup>, Les Jozef Sudak<sup>b</sup>, Uttandaraman Sundararaj<sup>a\*</sup>

a. Center for Applied polymer and Nanotechnology (CAPNA), Department of Chemical and Petroleum Engineering, University of Calgary, Calgary, AB, Canada T2N 1N4.

b. Department of Mechanical and Manufacturing Engineering, University of Calgary, Calgary, AB, Canada T2N 1N4.

c. Sustainable Energy Laboratory, Department of Chemical and Petroleum Engineering, University of Calgary, Calgary, AB, Canada T2N 1N4.

d. UBC BioProducts Institute, departments of Chemical and Biological Engineering, University of British Columbia, Vancouver, BC Canada V6T 1Z4

## Crosslinking degree

The crosslink densities of the neat FKM samples were characterized by swelling analysis (ASTM D2765). The vulcanized samples prepared by different processing methods including homogenization (H), bath ultrasonication (BU) and combination of H and BU process, were soaked in acetone for 24 h and dried in an oven at 110°C for 2 hrs. The degree of crosslinking was calculated according to equation (1):

$$\alpha = \frac{W_1}{W_2} \times 100\% \quad (1)$$

where  $\alpha$  is the degree of crosslinking and  $W_1$  and  $W_2$  are the weights of the testing specimen before and after extraction respectively. **Fig. S1** shows the results of crosslinking agent degree for different process.

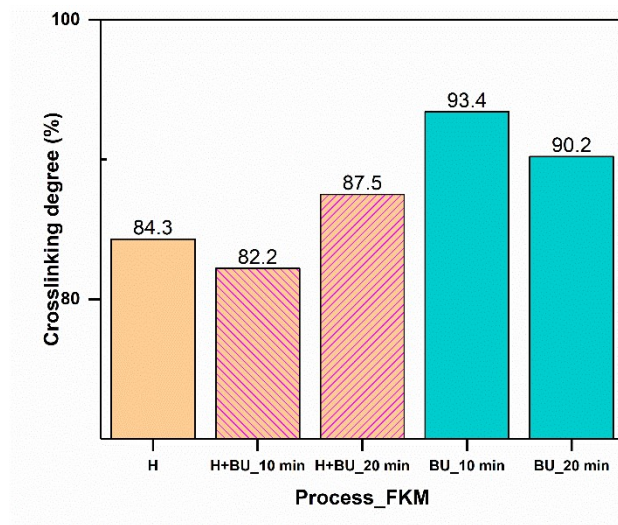

**Fig. S1.** Crosslinking degree comparison in different processing methods of FKM and crosslinking agents' solution including homogenization (H), bath ultrasonication (BU) and combination of H and BU process.

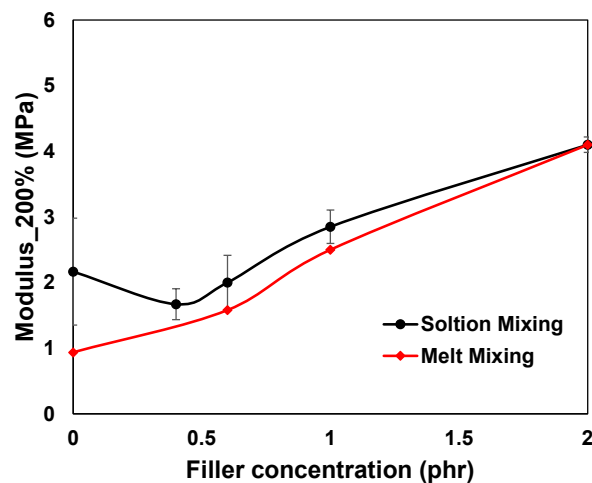

**Fig. S2.** A comparison of tensile modulus at 200% strain for solution mixing (SM) and melt mixing (MM) process for CNT/FKM nanocomposites
