# Supplementary figures and images for: A solution-processable and highly flexible conductor of a fluoroelastomer FKM and carbon nanotubes with tuned electrical conductivity and mechanical performance
Source: Royal Society of Chemistry journal article supplement (doi:10.1039/d2sm00838f), 2022-01-01

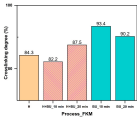

Supplement: d2sm00838f2.pdf [file d2sm00838f2.pdf]

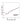

Supplement: d2sm00838f3.pdf [file d2sm00838f3.pdf]
